# Supplementary material for: Hepatic AKT orchestrates adipose tissue thermogenesis via FGF21-dependent and -independent mechanisms
Source: PubMed Central journal article supplement — Cell Rep. Author manuscript; Available in PMC 2021 Jun 1. (PMC8167823; doi:10.1016/j.celrep.2021.109128), 2021-05-18
Supplement: NIHMS1706268-supplement-1.pdf [file NIHMS1706268-supplement-1.pdf]

**Cell Reports, Volume 35**

**Supplemental information**

**Hepatic AKT orchestrates adipose tissue  
thermogenesis via FGF21-dependent  
and -independent mechanisms**

**Jaimarie Sostre-Colón, Kahealani Uehara, Anna E. Garcia Whitlock, Matthew J. Gavin, Jeff Ishibashi, Matthew J. Potthoff, Patrick Seale, and Paul M. Titchenell**

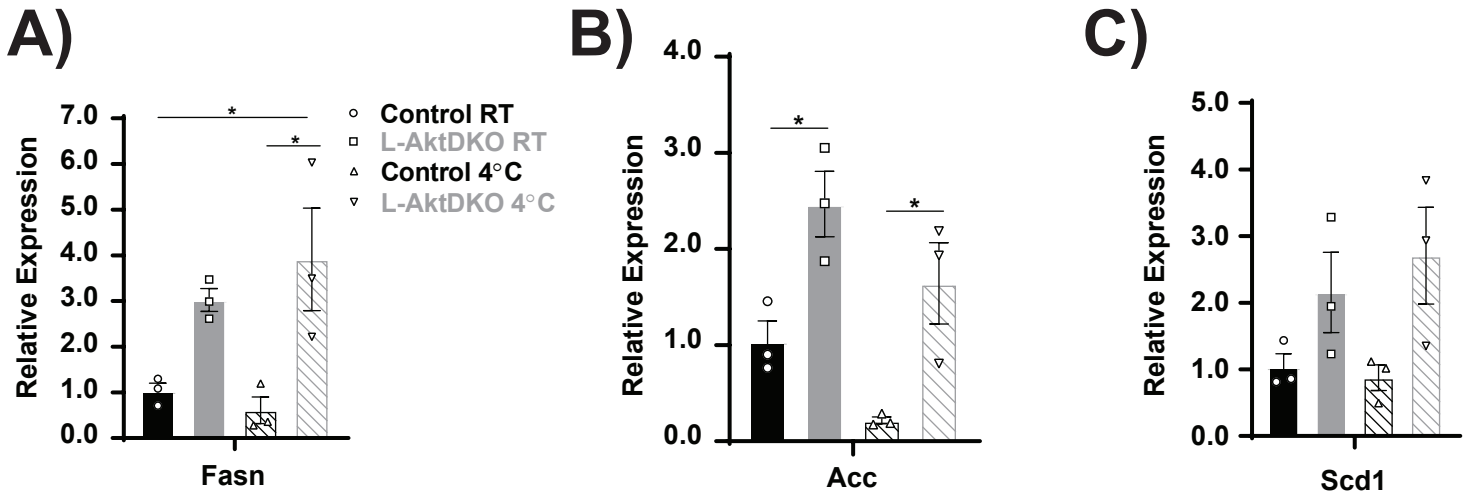

**Figure S1. The loss of liver AKT increases BAT fatty acids synthesis genes, Related to Figure 1.**  
 A-C) Relative mRNA levels of *Fasn*, *Acc* and *Scd1* in BAT from Control and L-AktDKO mice housed at RT or 4°C for 3 h (n=3 per group).  
 Data are presented as means  $\pm$ SEM. \* $p < 0.05$ , \*\* $p < 0.01$ , \*\*\* $p < 0.001$ .

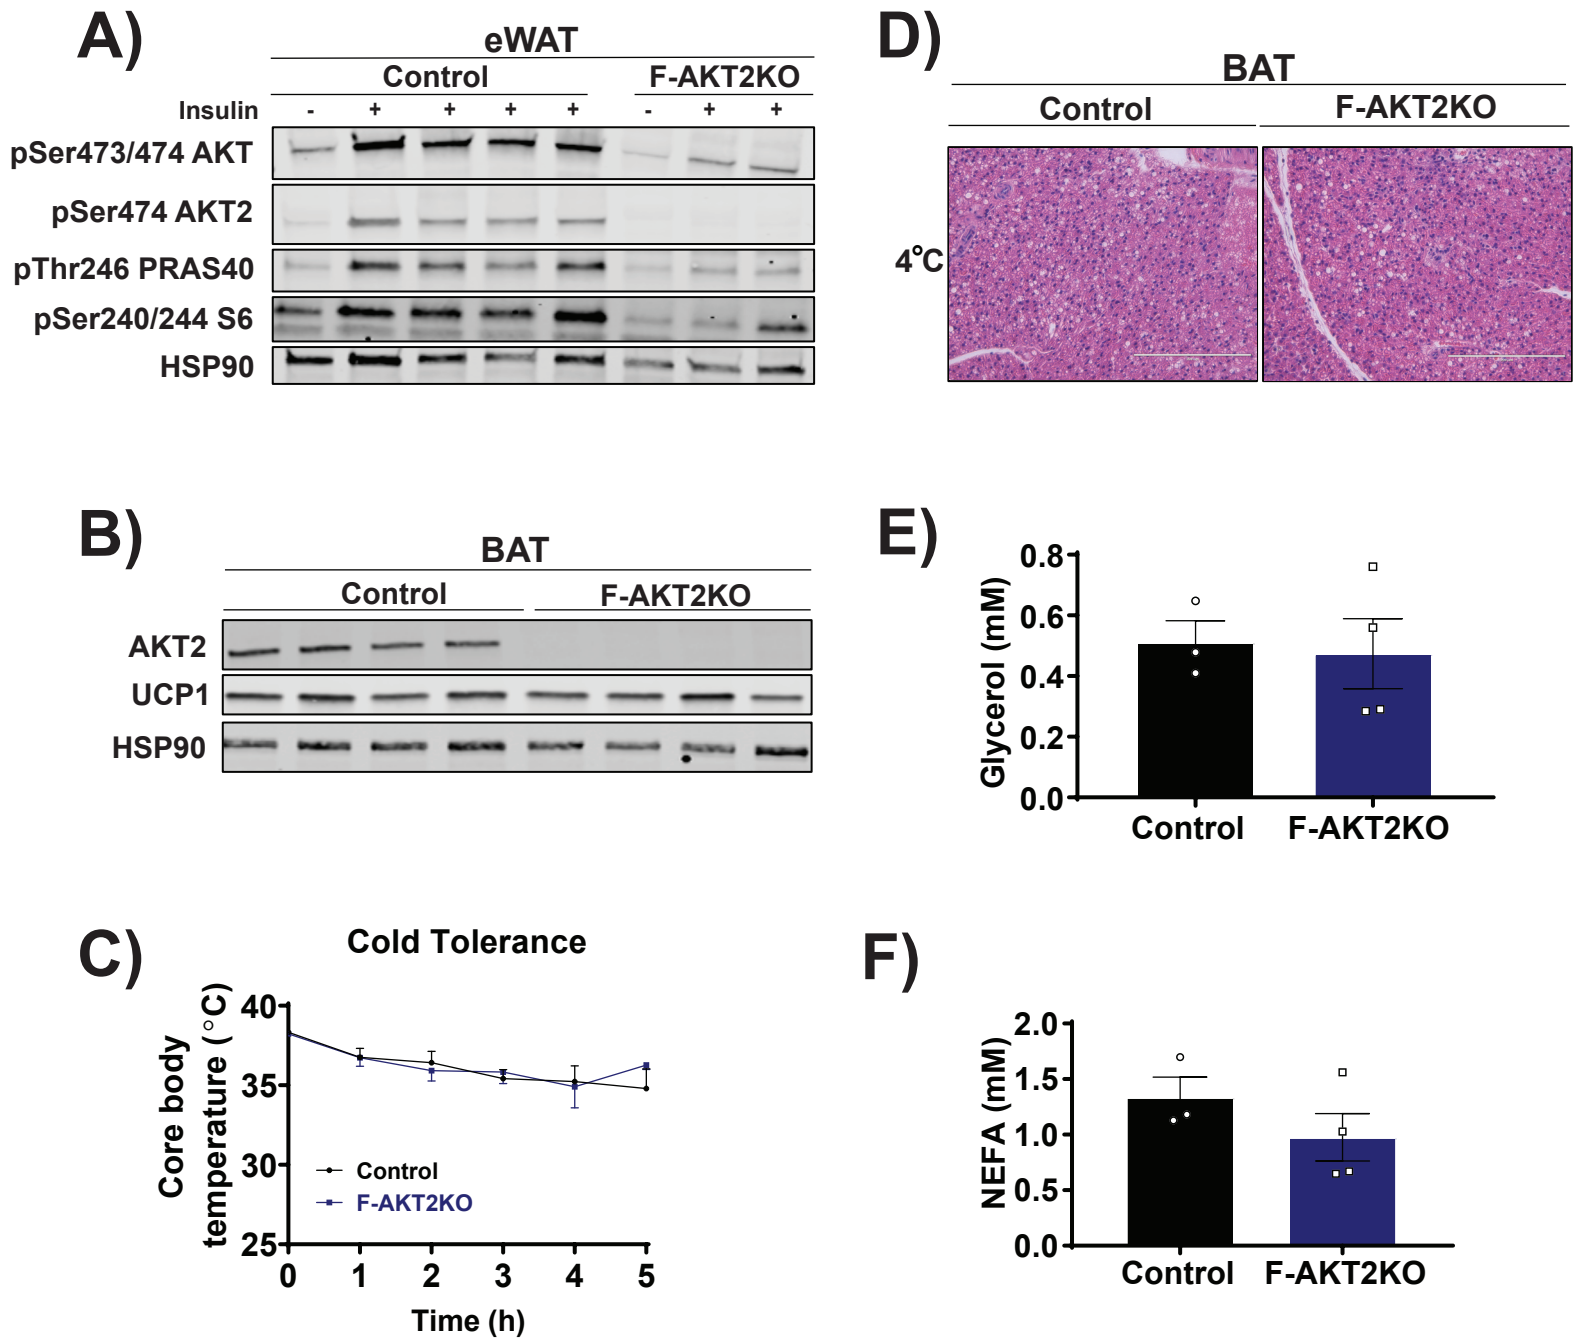

**Figure S2. The acute cold thermogenic response is independent of adipocyte AKT2 signaling, Related to Figure 1.**

A) Western Blot analysis of p-AKT (Ser473/474), p-AKT2 (474), p-PRAS40 (Thr246), and p-S6 (Ser240/244) of eWAT from Control and F-AKT2KO mice under unstimulated or stimulated conditions with insulin (2 U/kg) for 20 min after overnight fasting.

B) Western Blot analysis of AKT2 and UCP1 of BAT from Control and F-AKT2KO after a fasting cold tolerance test for 5 h.

C) Core body temperature of Control and F-AKT2KO mice during a fasting acute cold tolerance test for 5 h (RT→4°C) (n=4 per group).

D) H&E staining of BAT from Control and F-AKT2KO after a fasting cold tolerance test for 5 h. (Scale Bar=200µm)

E) Glycerol serum levels of Control and F-AKT2KO after a fasting cold tolerance test for 5 h (n=3 for Control, and n=4 for F-AKT2KO mice).

F) NEFA serum levels of Control and F-AKT2KO after a fasting cold tolerance test for 5 h (n=3 for Control, and n=4 for F-AKT2KO mice).

Data are presented as means ±SEM. \*p<0.05, \*\*p<0.01, \*\*\*p<0.001.

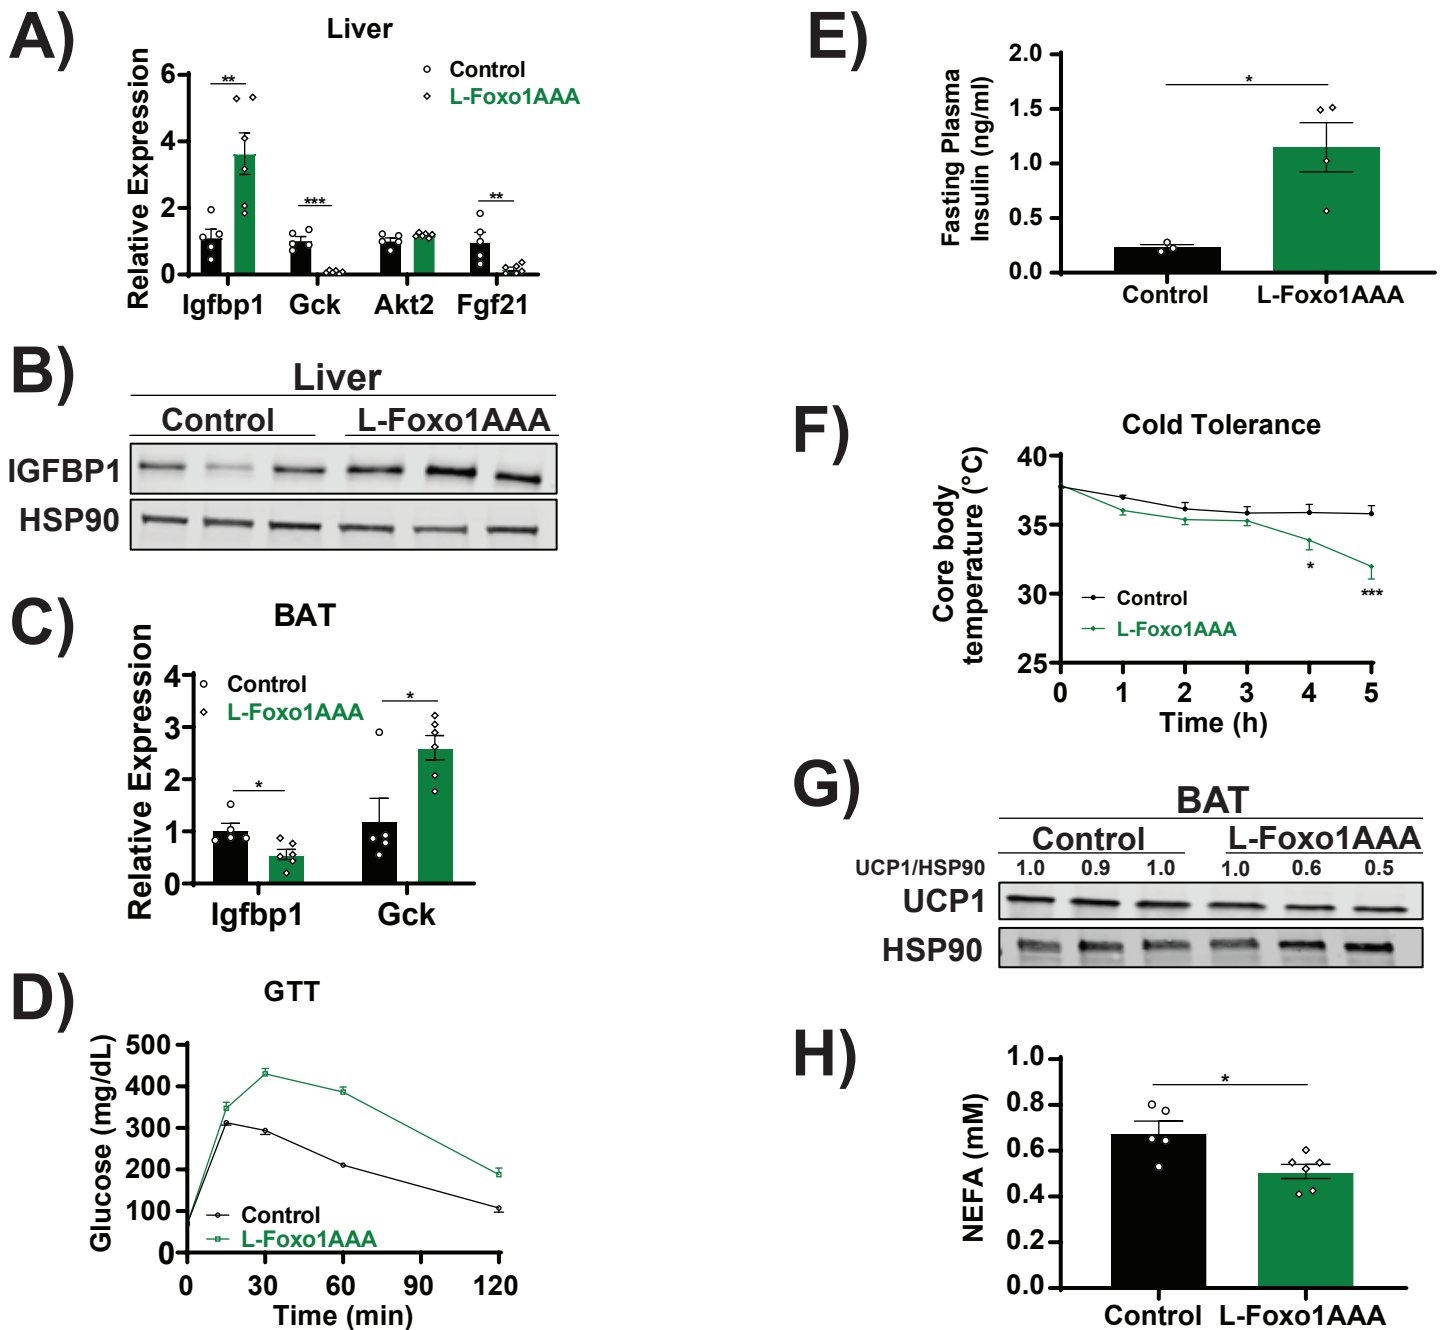

**Figure S3. Hepatic FOXO1 is sufficient to impair cold tolerance, Related to Figure 3.**

A) Relative mRNA levels of *Igfbp1*, *Gck*, *Akt2*, and *Fgf21* in liver from Control and L-Foxo1AAA mice (n=5 for Control mice and n=6 for L-Foxo1AAA mice).

B) Western Blot analysis of IGFBP1 of liver from Control and L-Foxo1AAA mice.

C) Relative mRNA levels of *Igfbp1*, and *Gck* in BAT from Control and L-Foxo1AAA mice (n=5 for Control mice and n=6 for L-Foxo1AAA mice).

D) Glucose levels of Control and L-Foxo1AAA mice housed at RT after i.p. injection of 2 mg/kg of glucose solution (n=3 for Control mice and n=4 for L-Foxo1AAA mice).

E) Fasting insulin levels of Control and L-Foxo1AAA mice housed at RT (n=3 for Control mice and n=4 for L-Foxo1AAA mice).

F) Core body temperature of Control and L-Foxo1AAA mice during a fasting acute cold tolerance test for 5 h (RT→4°C) (n=5 for Control mice and n=6 for L-Foxo1AAA mice).

G) Western Blot analysis of UCP1 of BAT from Control and L-Foxo1AAA mice after a fasting acute cold tolerance test for 5 h.

H) NEFA serum levels of Control and L-Foxo1AAA mice after a fasting acute cold tolerance test for 5 h (n=5 for Control mice and n=6 for L-Foxo1AAA mice).

Data are presented as means  $\pm$  SEM. \*p<0.05, \*\*p<0.01, \*\*\*p<0.001.

A)

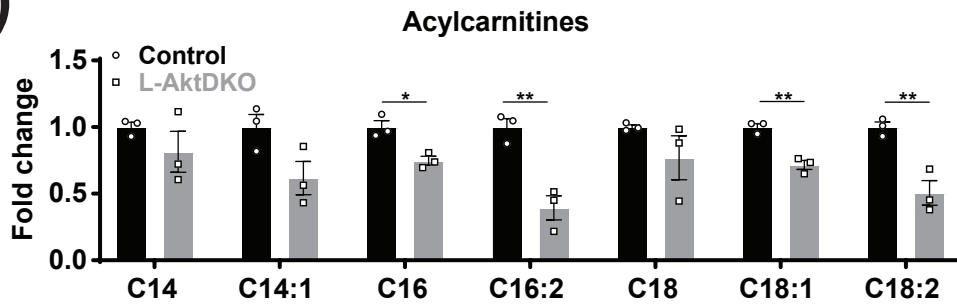

**Figure S4. The inhibition of liver AKT decreases serum acylcarnitines levels, Related to Figure 4.**

A) Acylcarnitines serum levels of Control and L-AktDKO mice after a fasting acute cold tolerance test for 5 h (n=3 per group).

Data are presented as means  $\pm$ SEM. \*p<0.05, \*\*p<0.01, \*\*\*p<0.001.

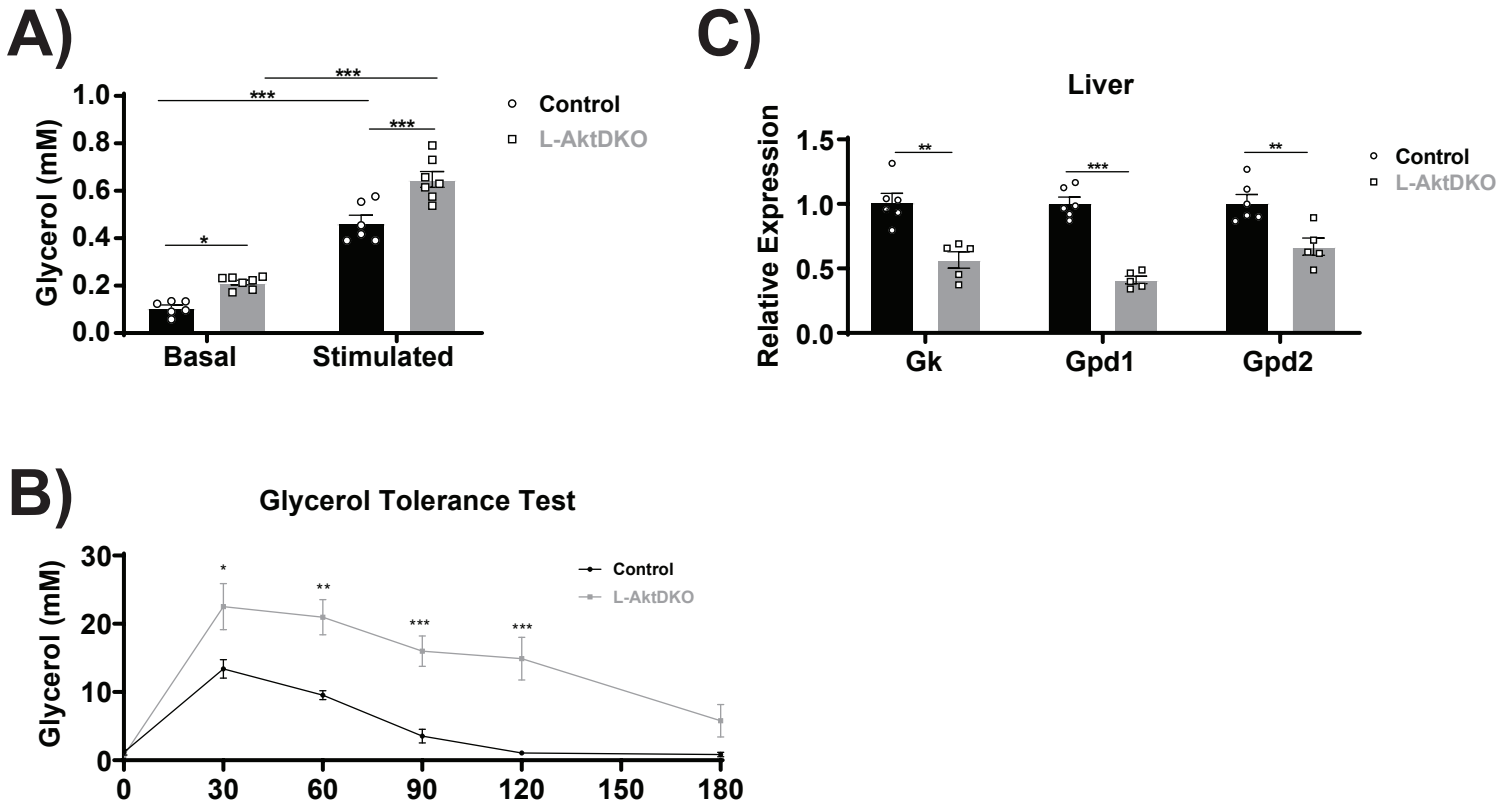

**Figure S5. The loss of hepatic AKT impairs glycerol metabolism, Related to Figure 4.**

A) Glycerol serum levels of Control and L-AktDKO mice housed at RT before and after 30 min of CL 316,243 i.p. injection (n=6 for Control mice and n=7 for L-AktDKO mice).

B) Glycerol serum levels of Control and L-AktDKO mice housed at RT after i.p. injection of 2 mg/kg glycerol solution (n=3 per group).

C) Relative mRNA levels of *Gk*, *Gpd1* and *Gpd2* in liver from Control and L-AktDKO mice after a fasting cold tolerance test for 5 h (n=6 for Control mice and n=5 for L-AktDKO mice).

Data are presented as means  $\pm$  SEM. \*p<0.05, \*\*p<0.01, \*\*\*p<0.001.

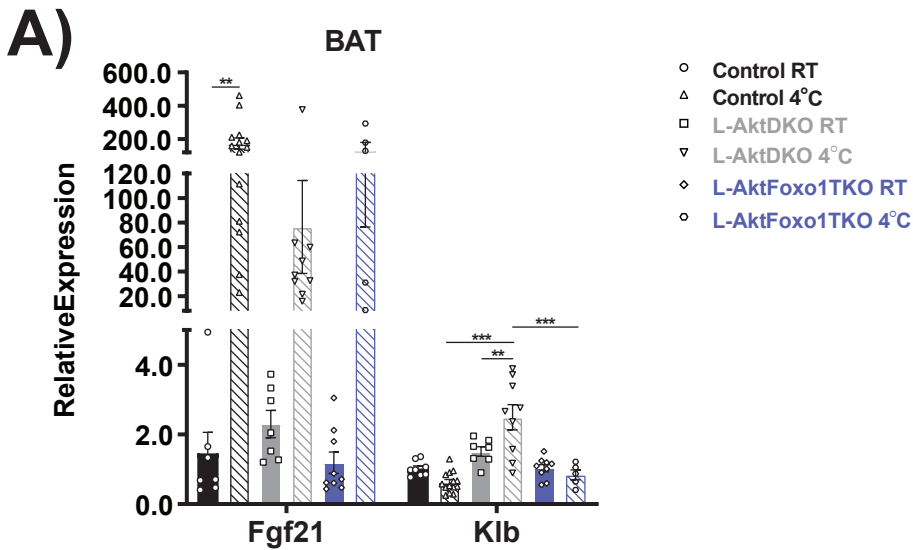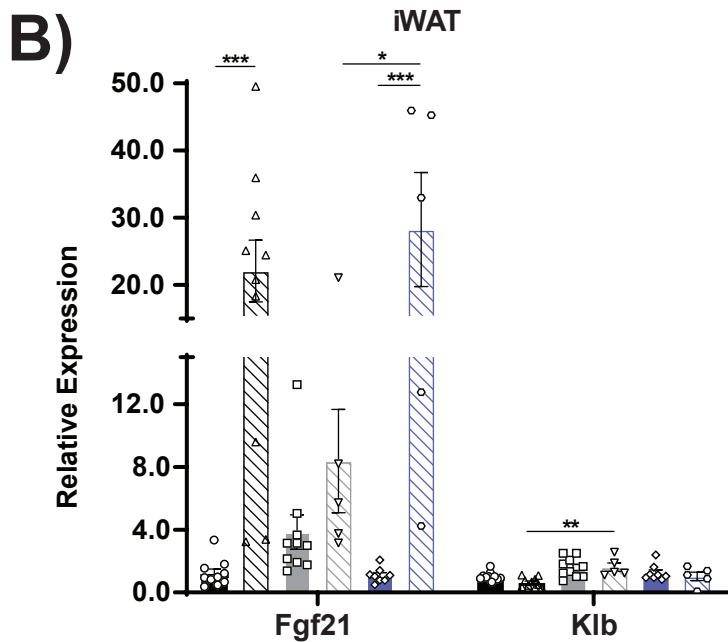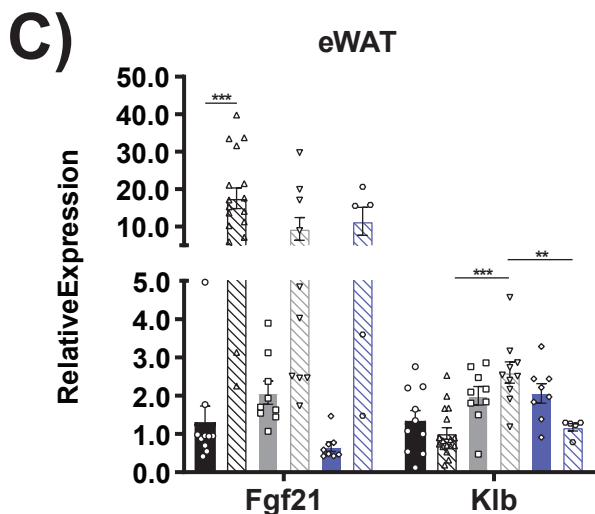

**Figure S6. *Fgf21* and  $\beta$ -*Klotho* gene expression in BAT and WAT, Related to Figure 5.**

A-C) Relative mRNA levels of *Fgf21*, and *Klb* from BAT, iWAT and eWAT of Control, L-AktDKO and L-AktFoxo1TKO mice housed at RT or 4°C for 5 h (n=5-17 per group).

Data are presented as means  $\pm$  SEM. \*p<0.05, \*\*p<0.01, \*\*\*p<0.001.

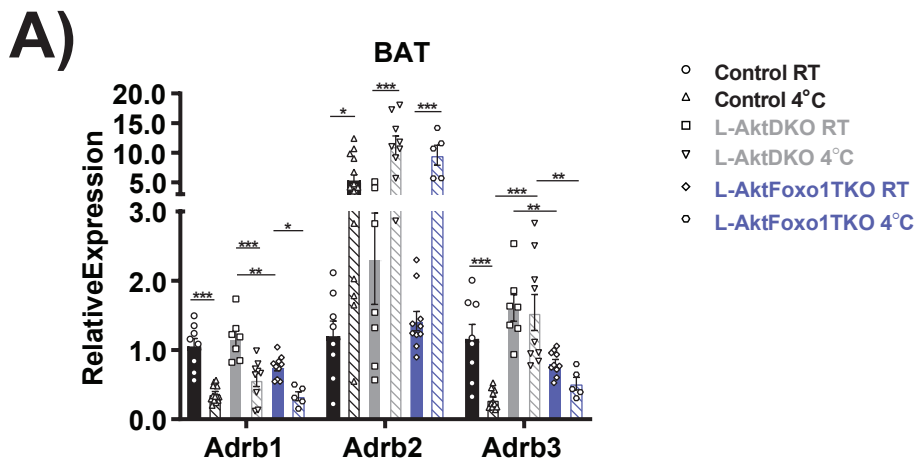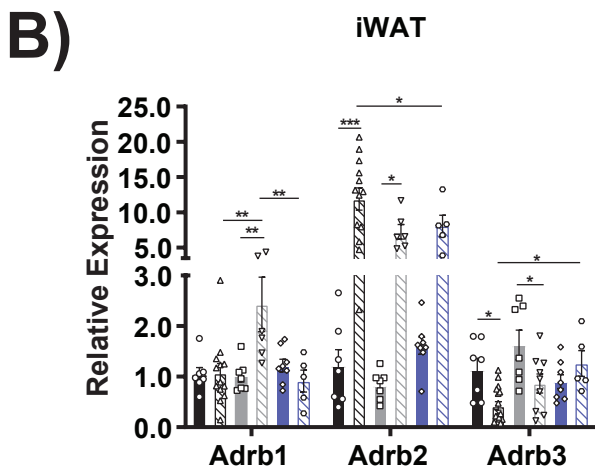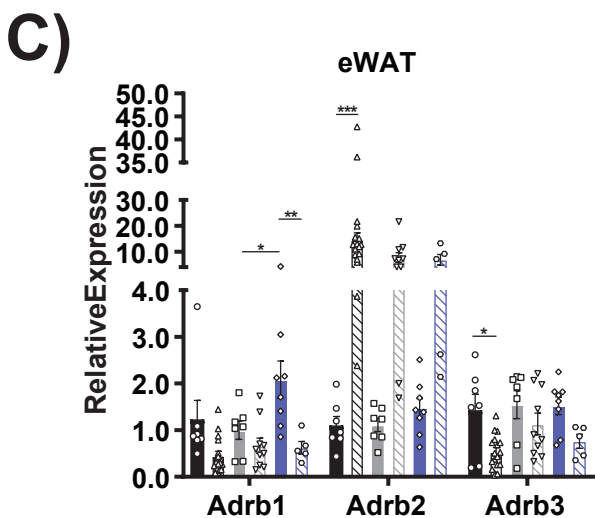

**Figure S7.  $\beta$ -Adrenergic receptors gene expression in BAT and WAT, Related to Figure 4.**

A-C) Relative mRNA levels of *Adrb1*, *Adrb2*, and *Adrb3* from BAT, iWAT and eWAT of Control, L-AktDKO and L-AktFoxo1TKO mice housed at RT or 4°C for 5 h (n=5-17 per group).

Data are presented as means  $\pm$  SEM. \*p<0.05, \*\*p<0.01, \*\*\*p<0.001



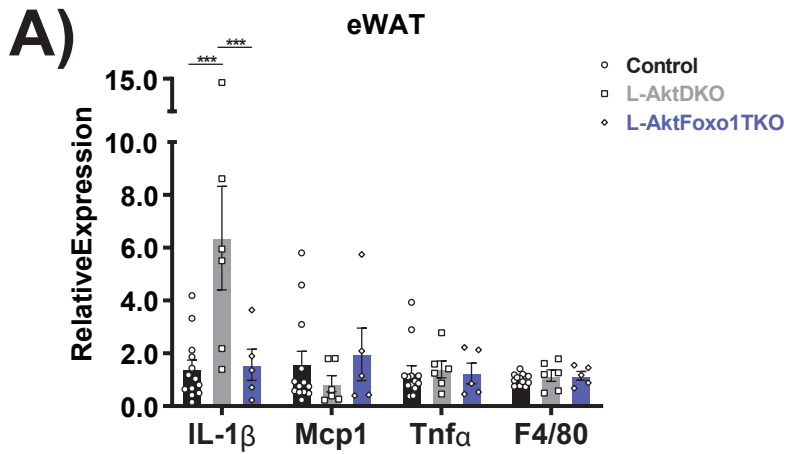

**Figure S8. The inhibition of hepatic AKT increases IL-1 $\beta$  cytokine levels in WAT, Related to Figure 4.**

A) Relative mRNA levels of *IL-1 $\beta$* , *Mcp1*, *Tnf $\alpha$* , and *F4/80* in eWAT from Control, L-AktDKO and L-AktFoxo1TKO mice after a fasting acute cold tolerance test for 5 h (RT $\rightarrow$ 4 $^{\circ}$ C) (n=13 for Control mice and n=6 for L-AktDKO mice and n=5 for L-AktFoxo1TKO mice).

Data are presented as means  $\pm$ SEM. \*p<0.05, \*\*p<0.01, \*\*\*p<0.001.

**Table S1. List of real-time PCR Primers listed 5' to 3', Related to the STAR Methods section.**

| <b>Gene</b>    | <b>Forward</b>            | <b>Reverse</b>                |
|----------------|---------------------------|-------------------------------|
| <i>Ucp1</i>    | TCAGGATTGGCCTCTACGAC      | TGCCACACCTCCAGTCATTA          |
| <i>Dio2</i>    | AATTATGCCTCGGAGAAGACCG    | GGCAGTTGCCTAGTGAAAGGT         |
| <i>Fgf21</i>   | GCTGCTGGAGGACGGTTACA      | CACAGGTCCCCAGGATGTTG          |
| <i>Akt2</i>    | ATGGATTACAAGTGTGGCTCCCC   | GTGCCTGGTATTCTGCAGAACC        |
| <i>Foxo1</i>   | CTGGGTGTCAGGCTAAGAGT      | GGGGTGAAGGGCATCTTT            |
| <i>Fasn</i>    | GCTGCGGAAACTTCAGGAAAT     | AGAGACGTGTCACTCCTGGACTT       |
| <i>Acc</i>     | TGACAGACTGATCGCAGAGAAAG   | TGGAGAGCCCCACACACA            |
| <i>Scd1</i>    | CCGGAGACCCCTTAGATCGA      | TAGCCTGTAAAAGATTTCTGCAAA      |
| <i>Igf1bp1</i> | GGAGATCGCCGACCTCAAG       | CTGCAGCTAATCTCTCTAGCACTTTATAG |
| <i>Gck</i>     | CCCTGAGTGGCTTACAGTTC      | ACGGATGTGAGTGTTGAAGC          |
| <i>Gk</i>      | CCCAAGAGAAGGATGGGTAGAACA  | GGTCAAGCCACACCACGGCATTAT      |
| <i>Gpd1</i>    | TTCAGTGCAGGTGTACAAAGTGTGC | CATTCACATGTGTTCCGGGTGGTT      |
| <i>Gpd2</i>    | GAAGGGGACTATTCTTGTGGGT    | GGATGTCAAATTCGGGTGTGT         |
| <i>Klb</i>     | GATGAAGAATTTCTAAACCAGGTT  | AACCAAACACGCGGATTTT           |
| <i>Adrb1</i>   | GAAAGCAGGTGAATGCAAAGC     | CCGAACCTCAGAGAGAAAGGA         |
| <i>Adrb2</i>   | TTGCAGTGGATCGCTATGTTG     | CGATAGCTTTCTTGTGGGTGG         |
| <i>Adrb3</i>   | TCGACATGTTCTCCACCAA       | GATGGTCCAAGATGGTGCTT          |
| <i>IL-1b</i>   | TGGAGAGTGTGGATCCCAAGCAAT  | TGTCCTGACCACTGTTGTTTCCCA      |
| <i>Mcp1</i>    | TCACCTGCTGCTACTCATTACCA   | TACAGCTTCTTTGGGACACCTGCT      |
| <i>Tnfa</i>    | TCTCATGCACCACCATCAAGGACT  | TGACCACTCTCCCTTTGCAGAACT      |
| <i>F4/80</i>   | TCAAATGGATCCAGAAGGCTCCCA  | TGCACTGCTTGGCATTGCTGTATC      |
